# Supplementary material
Source: PubMed Central journal article supplement (PMC4008989)
Supplement: cei0176-0438-sd1.pdf [file cei0176-0438-sd1.pdf]

| <i>Gene</i>   | <i>Forward (5'-3')</i> | <i>Reverse (5'-3')</i> |
|---------------|------------------------|------------------------|
| Bcl-2         | GTACCTGAACCGGCATCTG    | GCTGAGCAGGGTCTTCAGAG   |
| Bcl-xl        | TTCGGGATGGAGTAAACTGG   | TGGATCCAAGGCTCTAGGTG   |
| Bax           | TGCAGAGGATGATTGCTGAC   | GATCAGCTCGGGCACTTTAG   |
| Bak           | CGCTACGACACAGAGTTCCA   | TCCATCTGGCGATGTAATGA   |
| IL-6          | AGTTGCCTTCTTGGGACTGA   | TCCACGATTTCCCAGAGAAC   |
| TNF- $\alpha$ | GAACTGGCAGAAGAGGCACT   | AGGGTCTGGGCCATAGAACT   |
| IL-1 $\beta$  | GGGCCTCAAAGGAAAGAATC   | TACCAGTTGGGGA ACTCTGC  |
| IL-10         | CCAAGCCTTATCGGAAATGA   | TTTTCACAGGGGAGAAATCG   |
| TGF- $\beta$  | TTGCTTCAGCTCCACAGAGA   | TGGTTGTAGAGGGCAAGGAC   |
| TLR4          | CTTCATTCAAGACCAAGCCTTC | AACCGATGGACGTGTAAACCAG |
| GAPDH         | AACTTGGCATTGTGGAAGG    | ACACATTGGGGGTAGGAACA   |
